# Supplementary material
Source: PubMed Central journal article supplement (PMC2043018)

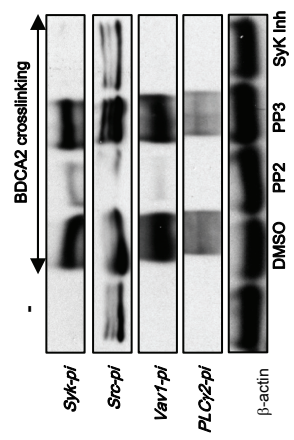

Supplement: pbio.0050248.sg003.pdf [file pbio.0050248.sg003.pdf]
